## Trends in reperfusion therapy for acute ST-segment elevation myocardial infarction in an academic PCI centre in the metropolitan area of a developing country

S. Dharma<sup>1</sup>, I. Dakota<sup>2</sup>, H. Andriantoro<sup>2</sup>, I. Firdaus<sup>2</sup>, I.G. Limadhy<sup>3</sup>, F. Van De Werf<sup>4</sup>

<sup>1</sup>National Cardiovascular Center Harapan Kita, Dept of Cardiology and Vascular Medicine, FKUI, Jakarta, Indonesia; <sup>2</sup>National Cardiovascular Center Harapan Kita, Department of Cardiology and Vascular Medicine, Faculty of Medicine, University of Indonesia, Jakarta, Indonesia; <sup>3</sup>National Cardiovascular Center Harapan Kita, Indonesian Cardiovascular Research Centre, Jakarta, Indonesia; <sup>4</sup>Department of Cardiovascular Sciences, KU Leuven, Leuven, Belgium

**Funding Acknowledgement:** Type of funding source: None

**Background:** Long-term reports on reperfusion therapy for acute ST-segment elevation myocardial infarction (STEMI) in developing countries are scarce.

**Purpose:** We reported changes in acute reperfusion therapy for STEMI that have been observed over time in an academic tertiary care percutaneous coronary intervention (PCI) centre that hosting a STEMI network in the large metropolitan area of Jakarta, Indonesia since 2010 and covering around 11 million inhabitants.

**Methods:** A retrospective analysis was performed in 6336 patients with STEMI who admitted to the emergency department of a PCI centre in 2008 (before STEMI network introduction), and during 2011 to 2018.

**Results:** Among STEMI patients admitted during 2011–2018 (mean age: 56±10 years, 86% male), 57.6% had anterior wall myocardial infarction, and 71.3% presented with Killip classification I. Compared with the pe-

riod 2011–2014 (N=2766), patients who were admitted in the period 2015–2018 (N=3250) were receiving more primary percutaneous coronary intervention (PCI) (61.6% vs. 44.2%,  $P<0.001$ ) with shorter door-to-device time (median 72 min versus 97 min,  $P<0.001$ ), and less in-hospital fibrinolytic therapy (2.7% vs. 4.8%,  $P<0.001$ ). The percentage of STEMI patients who did not receive reperfusion treatment decreased from 51% to 35.5% ( $P<0.001$ ). In-hospital mortality declined from 10% in 2008 (before the STEMI network was initiated) and 8% in 2011 to 6.4% in 2018 ( $P$  for trends = 0.05). Multivariable analysis showed that primary PCI was significantly associated with better in-hospital survival (adjusted odds ratio, 0.52; 95% confidence interval, 0.42 to 0.65,  $P<0.001$ ).

**Conclusion:** The data indicate that the introduction of a STEMI network resulted in more patients receiving timely primary PCI and lower early mortality rates in recent years.

Table 1. Multivariable analysis for predicting in-hospital mortality

|                       | Odds ratio | 95% confidence interval | P-value |
|-----------------------|------------|-------------------------|---------|
| Age >65 years         | 2.0        | 1.57–2.54               | <0.001  |
| Female                | 1.26       | 0.96–1.66               | 0.09    |
| Off-hours admission   | 1.23       | 1.00–1.52               | 0.06    |
| Anterior infarction   | 0.83       | 0.67–1.03               | 0.09    |
| Symptom onset 7–12h   | 1.41       | 1.10–1.82               | 0.01    |
| Fillip class II to IV | 4.11       | 3.30–5.11               | <0.001  |
| Diabetes mellitus     | 1.87       | 1.51–2.33               | <0.001  |
| Hypertension          | 0.82       | 0.66–1.02               | 0.08    |
| Primary PCI           | 0.52       | 0.42–0.65               | <0.001  |
